# Supplementary material for: (±)-Cryptamides A–D, Four Pairs of Novel Dopamine Enantiomer Trimers from the Periostracum Cicadae
Source: MDPI journal article supplement (doi:10.3390/molecules27196707), 2022-10-09
Supplement: s1 [file s1]

*Supplementary Materials*

# **(±)-Cryptamides A–D, Four Pairs of Novel Dopamine Enantiomer Trimers from the Periostracum Cicadae**

**Junjian Luo <sup>1,†</sup>, Wenjun Wei <sup>1,†</sup>, Pan Wang <sup>2</sup>, Tao Guo <sup>1,\*</sup>, Suiqing Chen <sup>1,\*</sup>, Liping Zhang<sup>1</sup> and Shuying Feng <sup>3,\*</sup>**

<sup>1</sup> School of Pharmacy, Henan University of Chinese Medicine, Zhengzhou 450046, China

<sup>2</sup> Academy of Chinese Medical Sciences, Henan University of Chinese Medicine, Zhengzhou 450046, China

<sup>3</sup> Medical College, Henan University of Chinese Medicine, Zhengzhou 450046, China

\* Correspondence: gt010010@163.com (T.G.); suiqingchen@163.com (S.C.); fsy@hactcm.edu.cn (S.F.)

† These authors contributed equally to this work.

## Computational Analysis

Table S1. Energy analysis for 1.

| Conformer | Gibbs free energy (298.15 K) |                       |                |
|-----------|------------------------------|-----------------------|----------------|
|           | G (Hartree)                  | $\Delta E$ (kcal/mol) | Population (%) |
| 1a        | -2003.2431                   | 0.0000                | 99.04          |
| 1b        | -2003.2383                   | 3.0160                | 0.61           |
| 1c        | -2003.2378                   | 3.3405                | 0.35           |

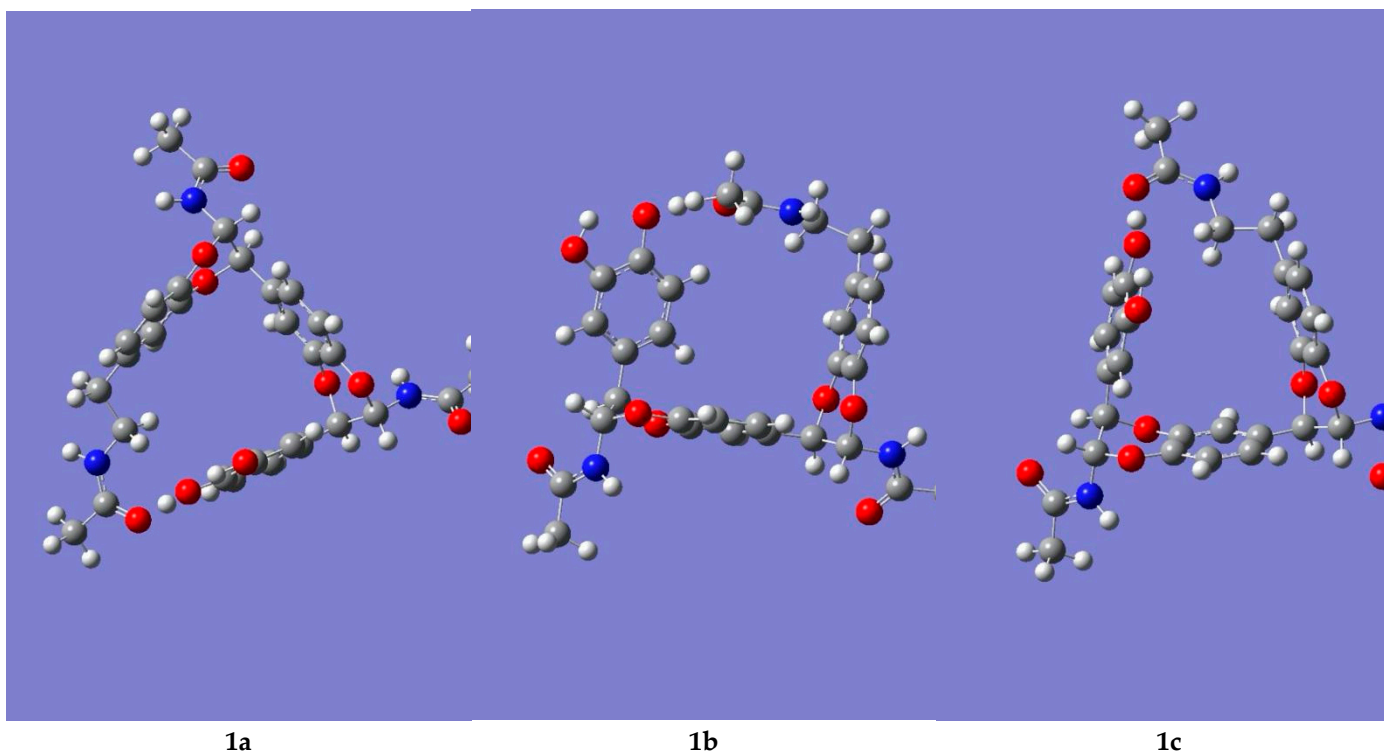

Table S2. Energy analysis for 2.

| Conformer | Gibbs free energy (298.15 K) |                       |                |
|-----------|------------------------------|-----------------------|----------------|
|           | G (Hartree)                  | $\Delta E$ (kcal/mol) | Population (%) |
| 2a        | -2003.2384                   | 0.0000                | 100            |
| 2b        | -2003.2278                   | 6.6484                | 0              |

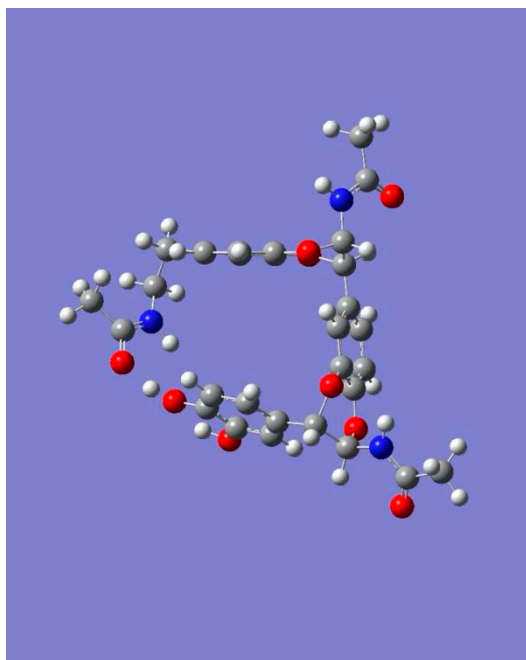

2a

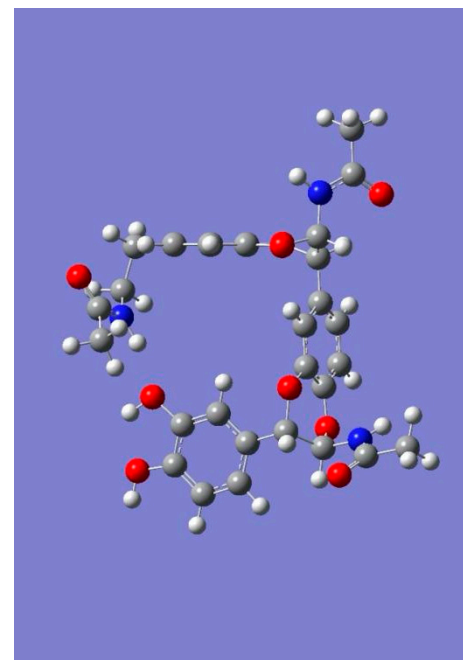

2b

Table S3. Energy analysis for 3.

| Conformer | Gibbs free energy (298.15 K) |                       |                |
|-----------|------------------------------|-----------------------|----------------|
|           | G (Hartree)                  | $\Delta E$ (kcal/mol) | Population (%) |
| 3a        | -2003.2445                   | 0.0000                | 99.92          |
| 3b        | -2003.2364                   | 5.0774                | 0.02           |
| 3c        | -2003.2376                   | 4.3398                | 0.07           |

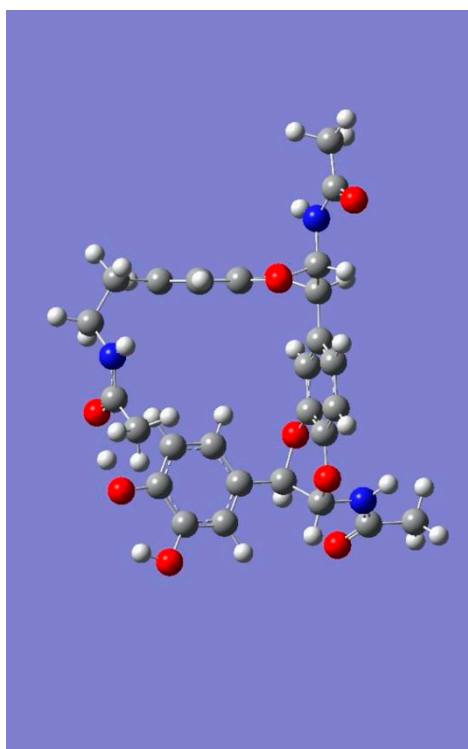

3a

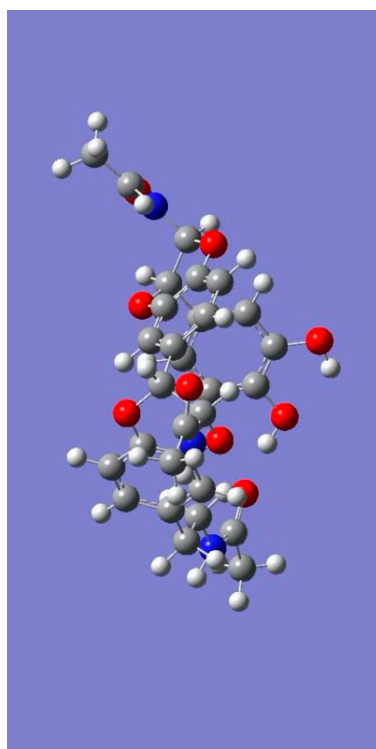

3b

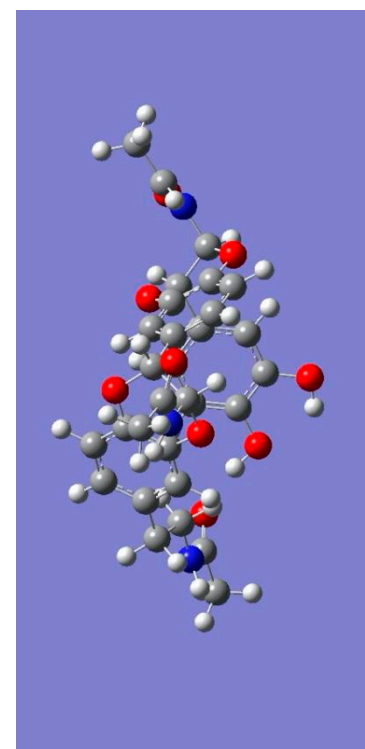

3c



**Table S4.** Energy analysis for 4.

| Conformer | Gibbs free energy (298.15 K) |                       |                |
|-----------|------------------------------|-----------------------|----------------|
|           | G (Hartree)                  | $\Delta E$ (kcal/mol) | Population (%) |
| 4a        | -2003.2441                   | 0.1745                | 42.68          |
| 4b        | -2003.2444                   | 0.0000                | 57.32          |

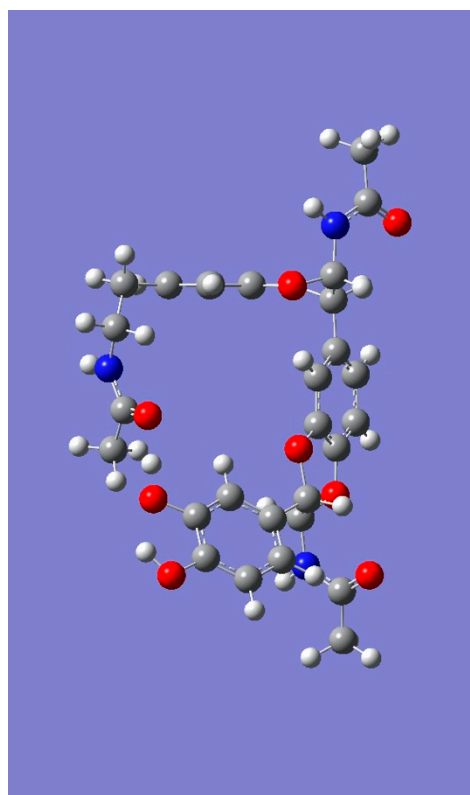**4a**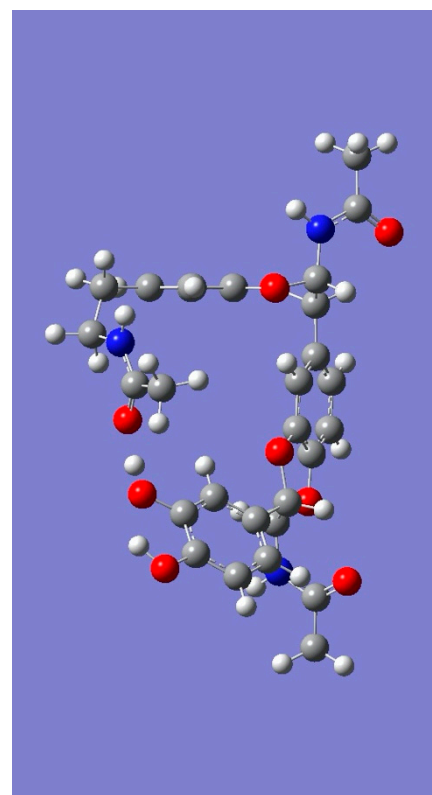**4b**

## NMR spectra of compounds 1–4

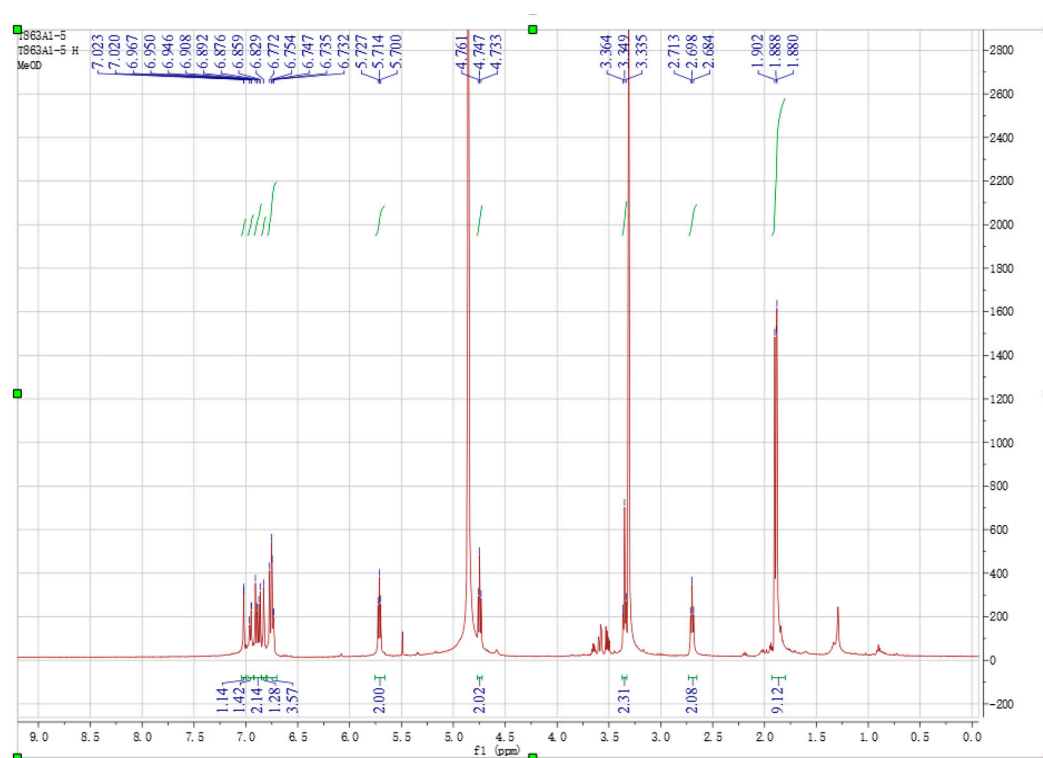Figure S1. <sup>1</sup>H-NMR spectrum of 1 in methanol-*d*<sub>4</sub>.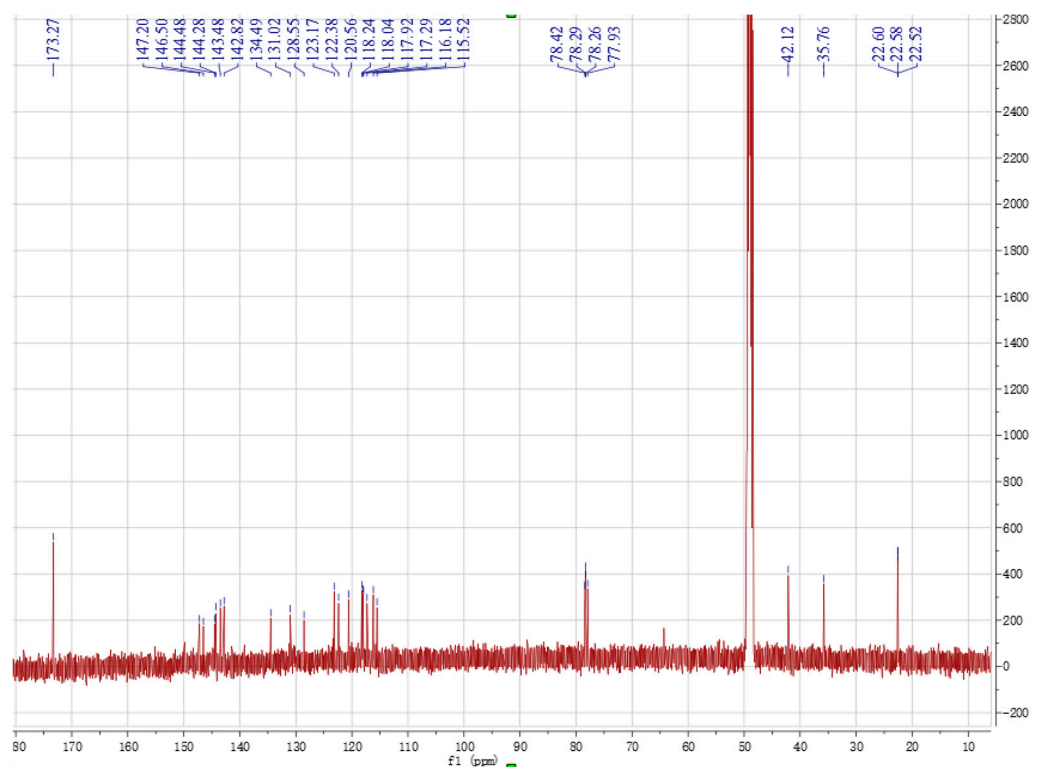Figure S2. <sup>13</sup>C-NMR spectrum of 1 in methanol-*d*<sub>4</sub>.

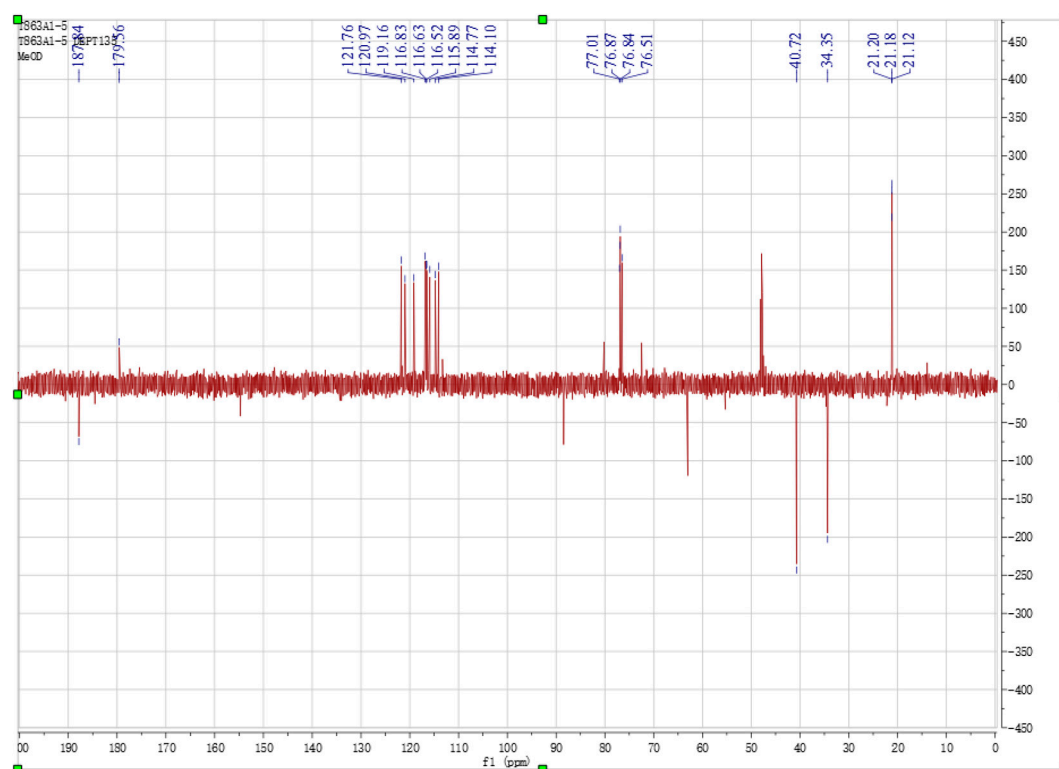

Figure S3. DEPT spectrum of **1** in methanol-*d*<sub>4</sub>.

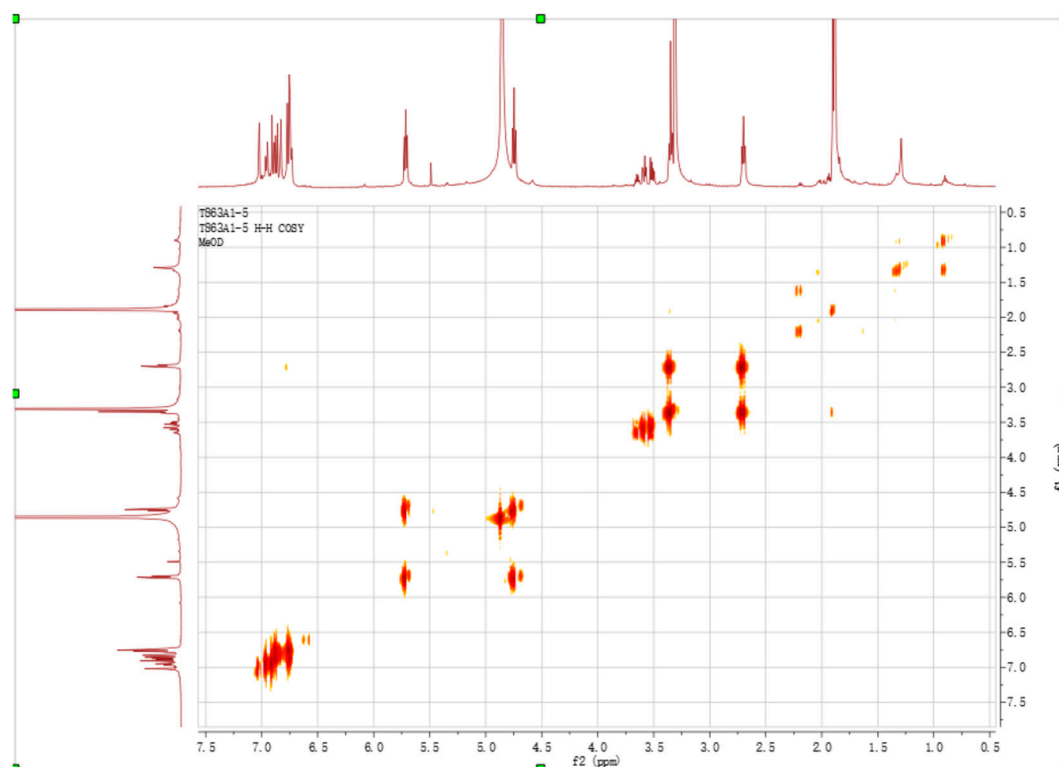

Figure S4. <sup>1</sup>H-<sup>1</sup>H-COSY spectrum of **1** in methanol-*d*<sub>4</sub>.

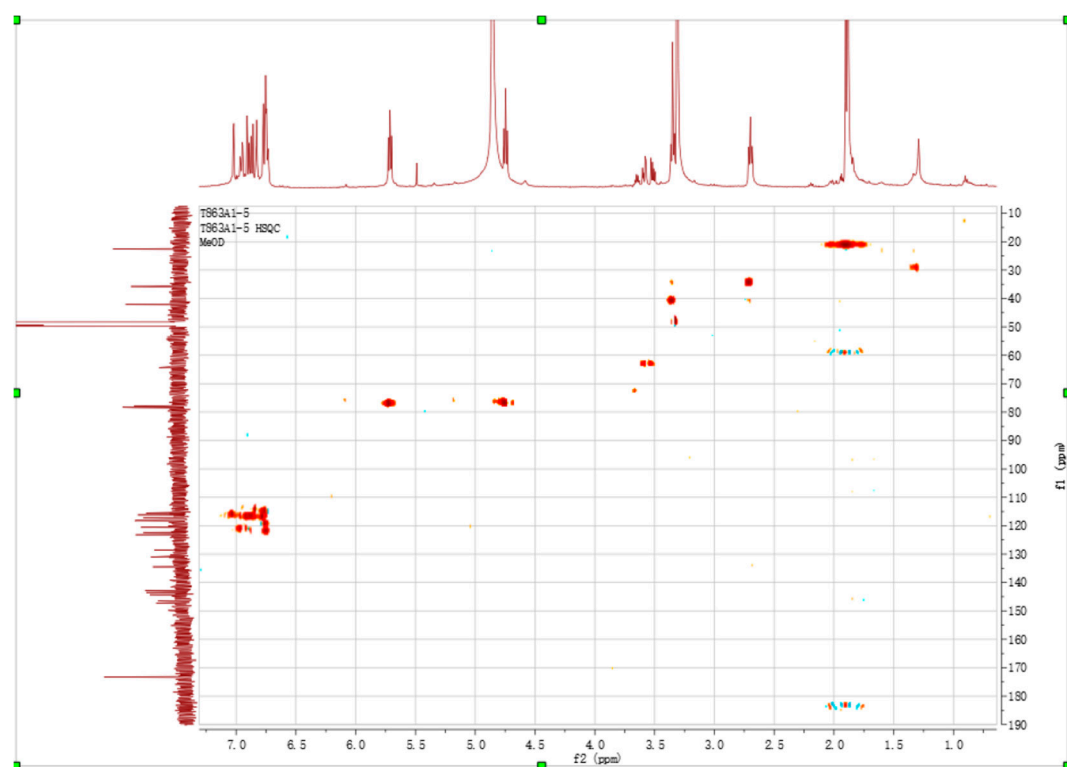

Figure S5. HSQC spectrum of **1** in methanol-*d*<sub>4</sub>.

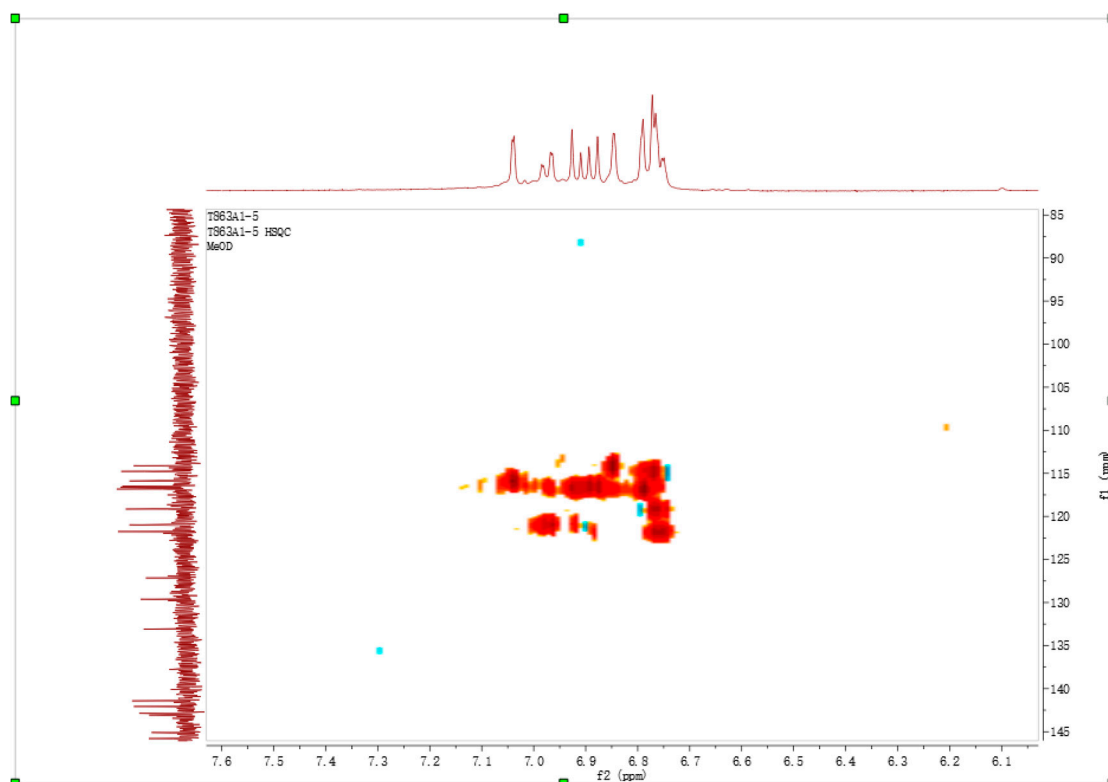

Figure S6. zoomed aromatic region of HSQC spectra of **1**.

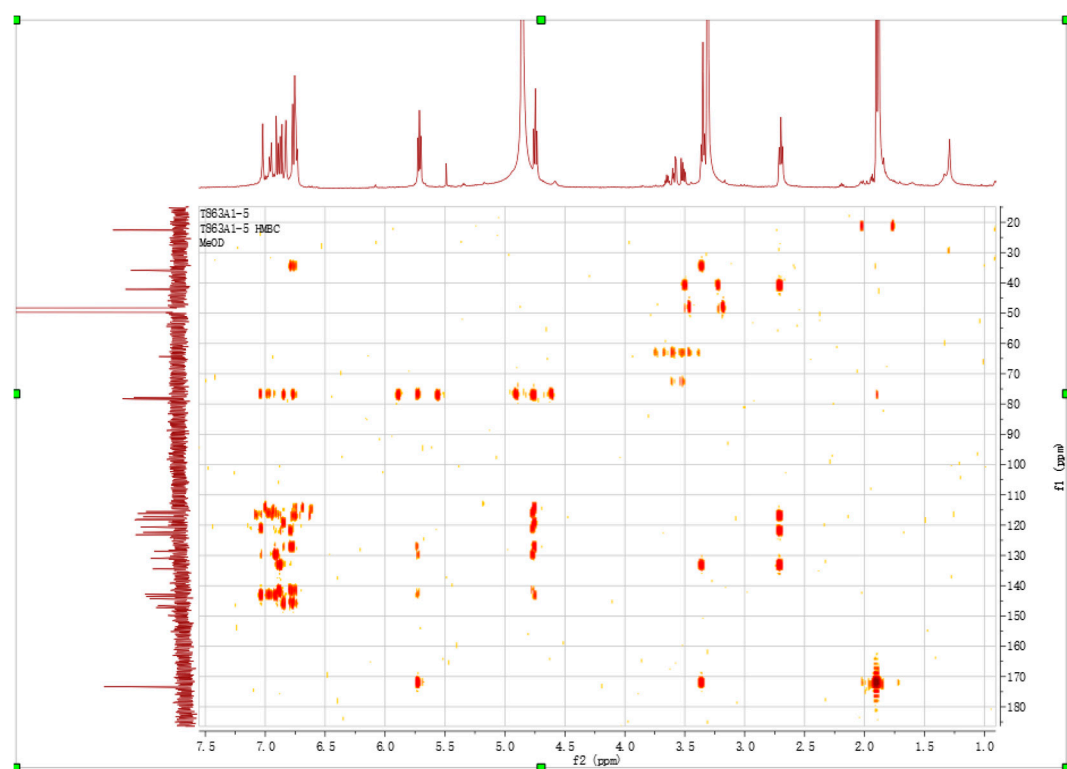

Figure S7. HMBC spectrum of **1** in methanol-*d*<sub>4</sub>.

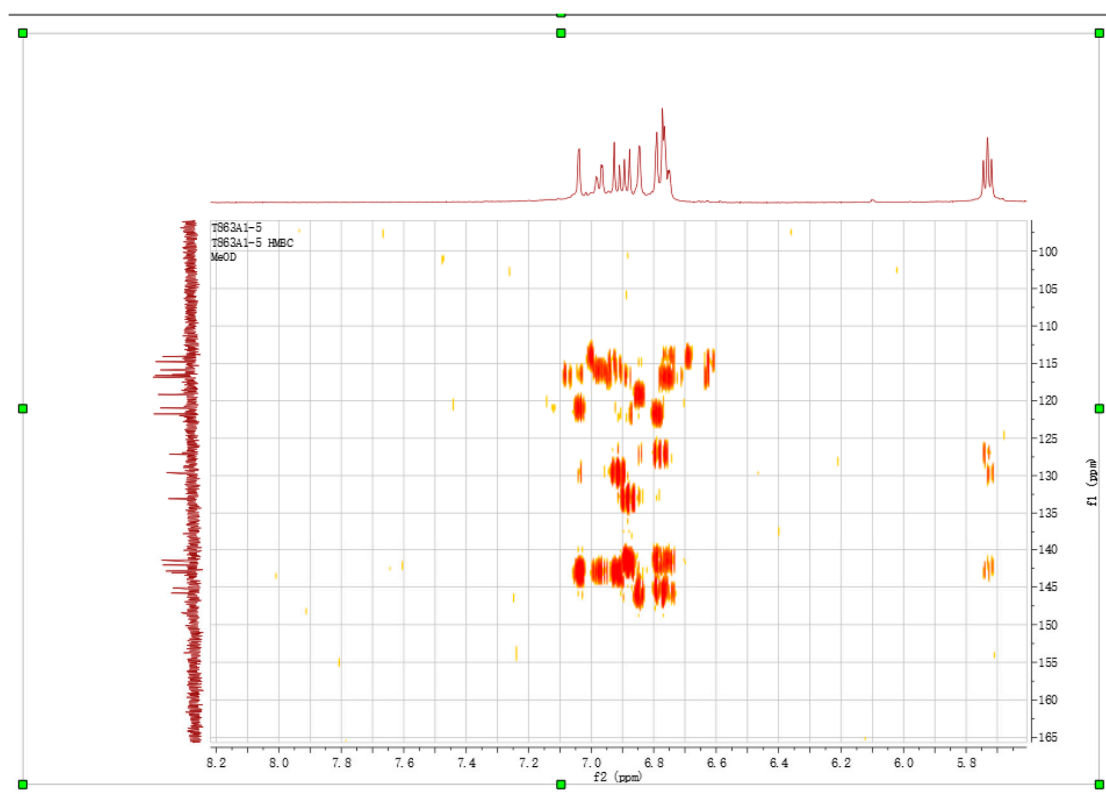

Figure S8. zoomed aromatic region of HMBC spectra of **1**.

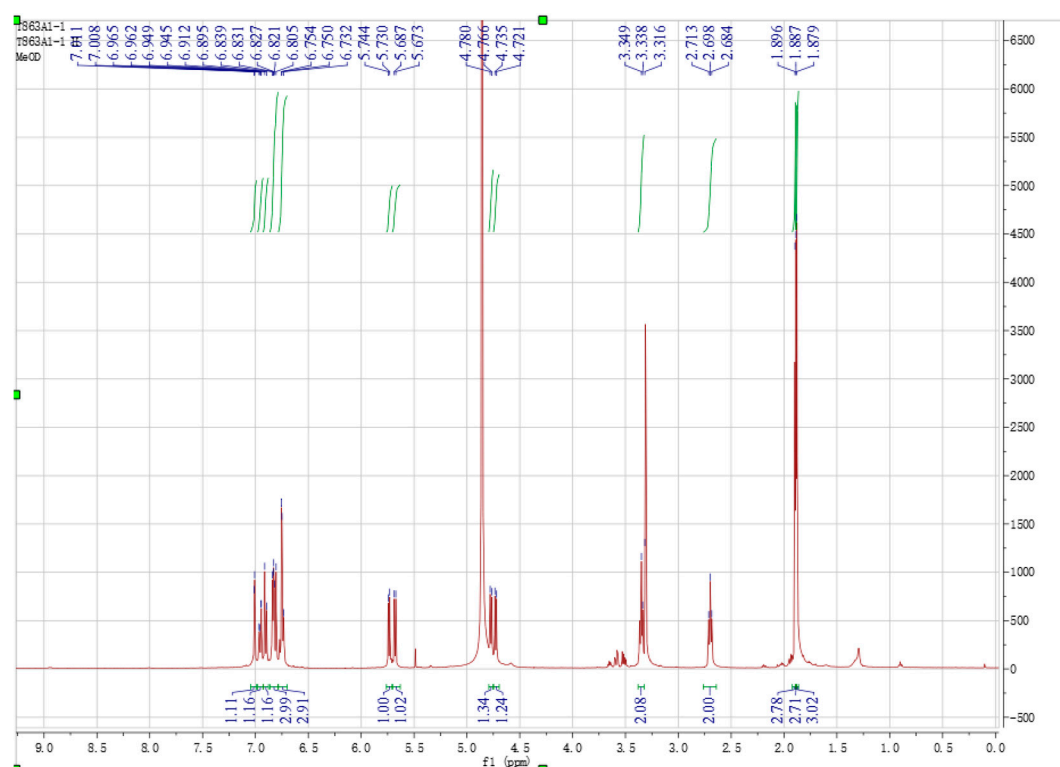Figure S9. <sup>1</sup>H-NMR spectrum of 2 in methanol-*d*<sub>4</sub>.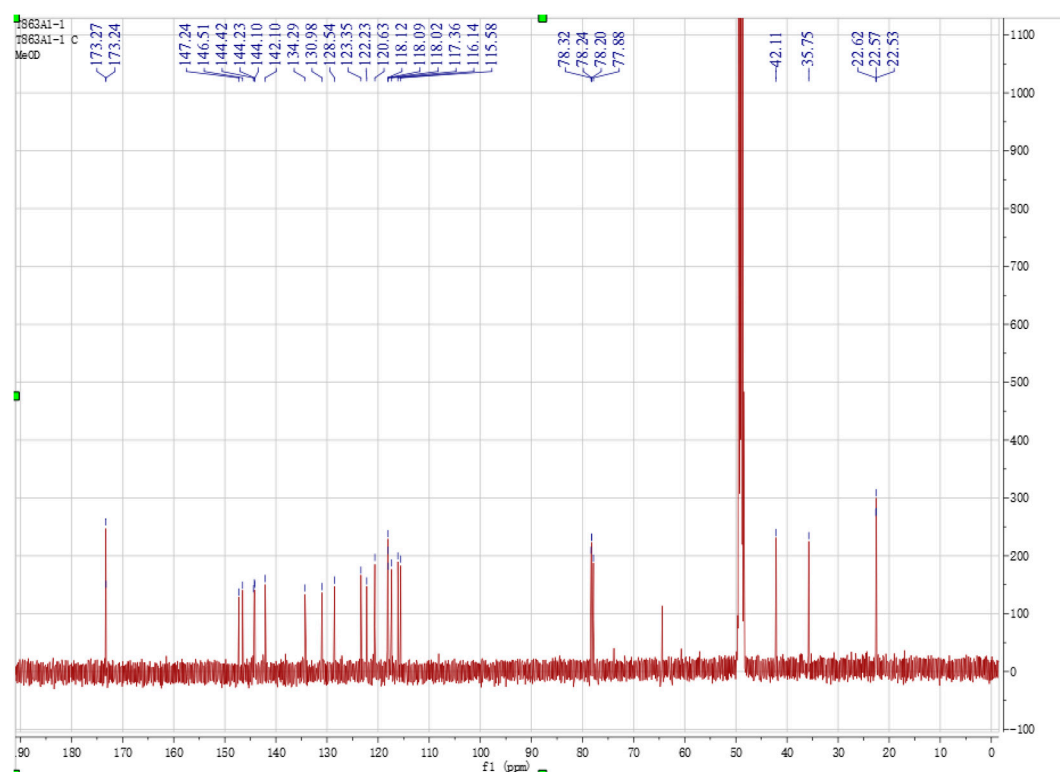Figure S10. <sup>13</sup>C-NMR spectrum of 2 in methanol-*d*<sub>4</sub>.

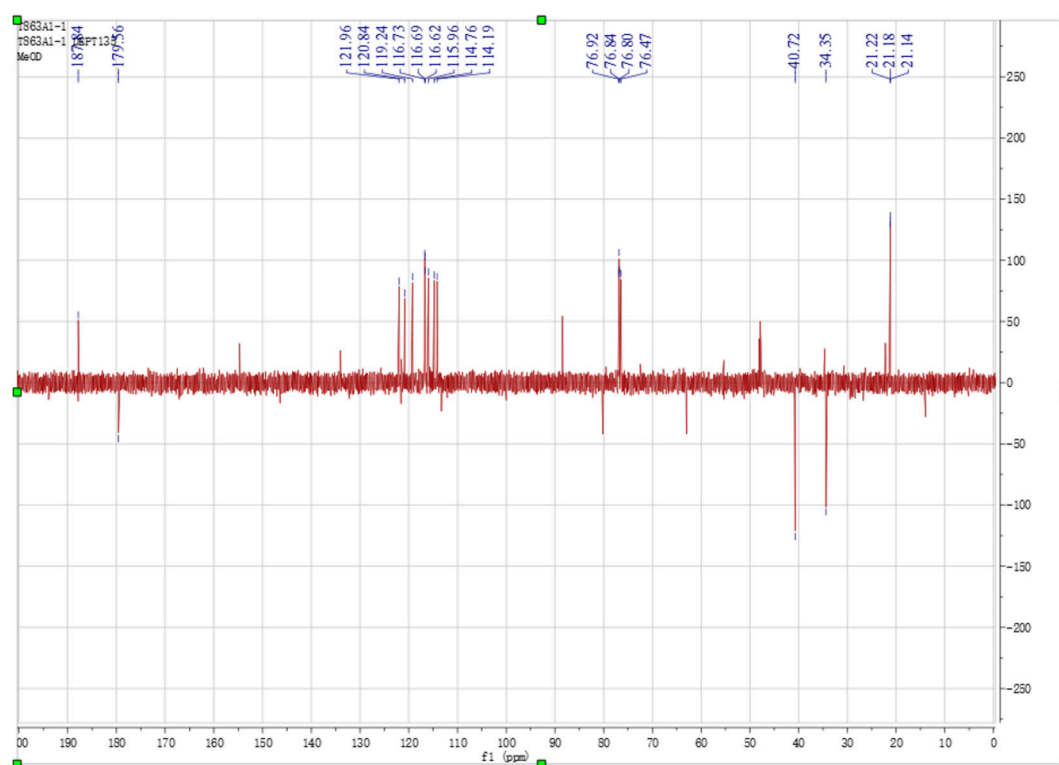Figure S11. DEPT spectrum of 2 in methanol- $d_4$ .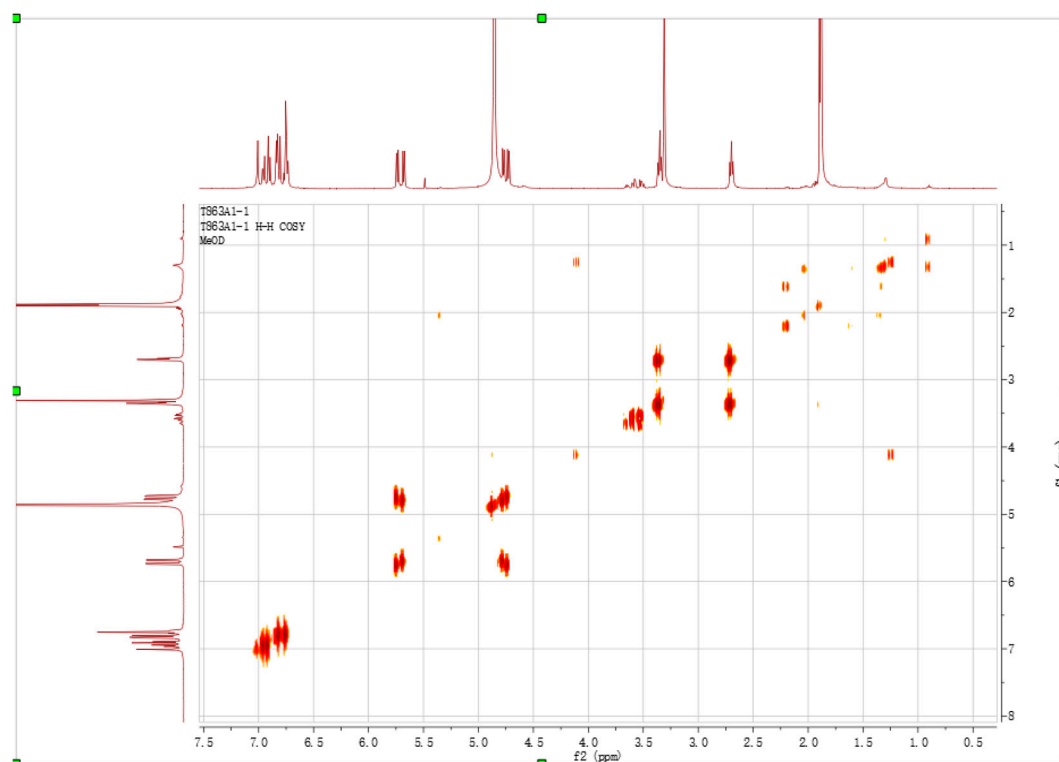Figure S12.  $^1\text{H}$ - $^1\text{H}$ -COSY spectrum of 2 in methanol- $d_4$ .

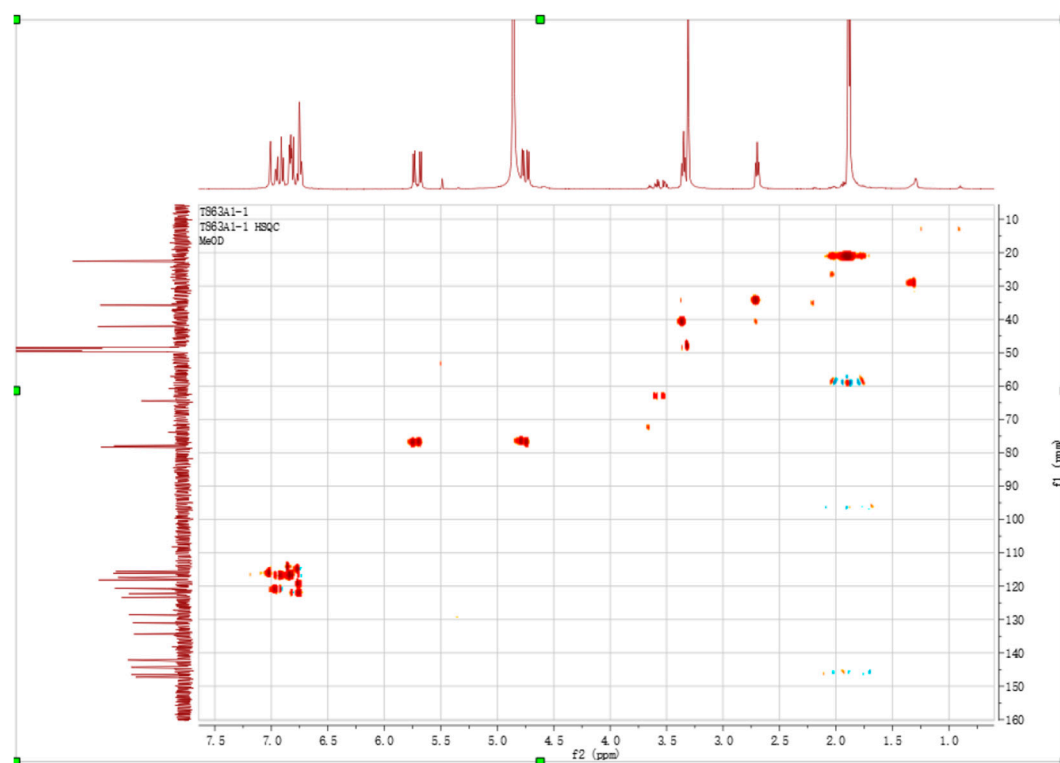

Figure S13. HSQC spectrum of **2** in methanol- $d_4$ .

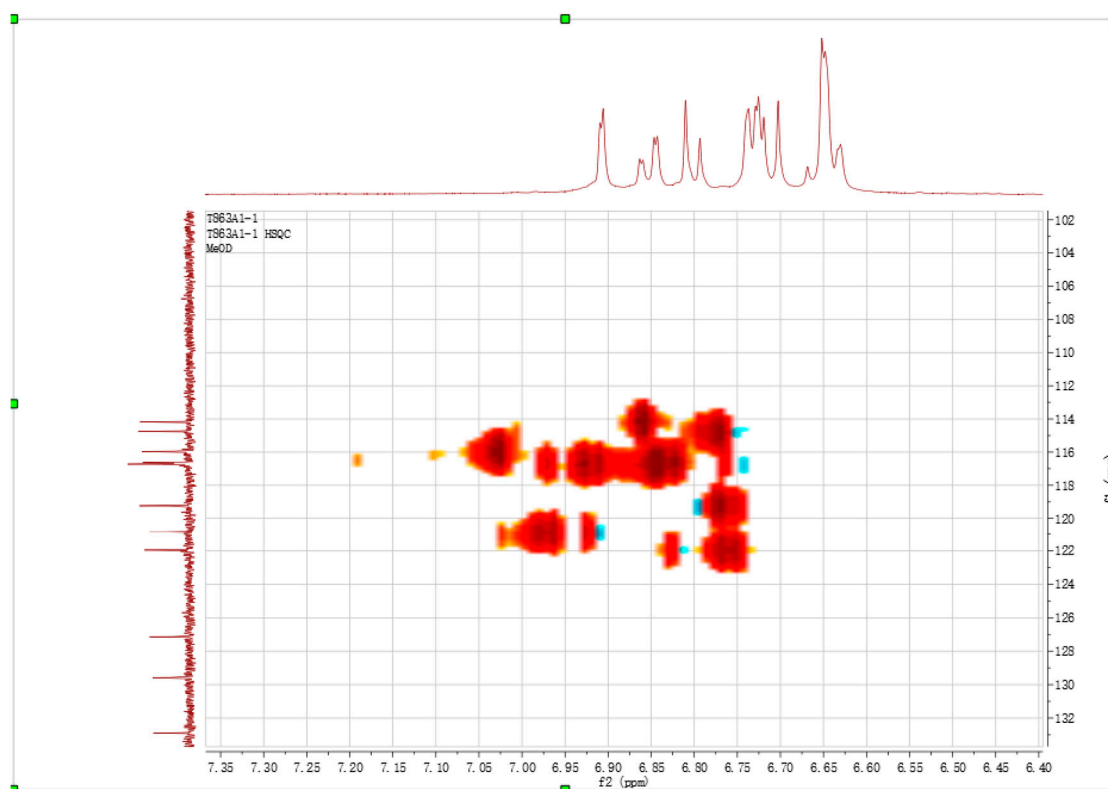

Figure S14. zoomed aromatic region of HSQC spectra of **2**.



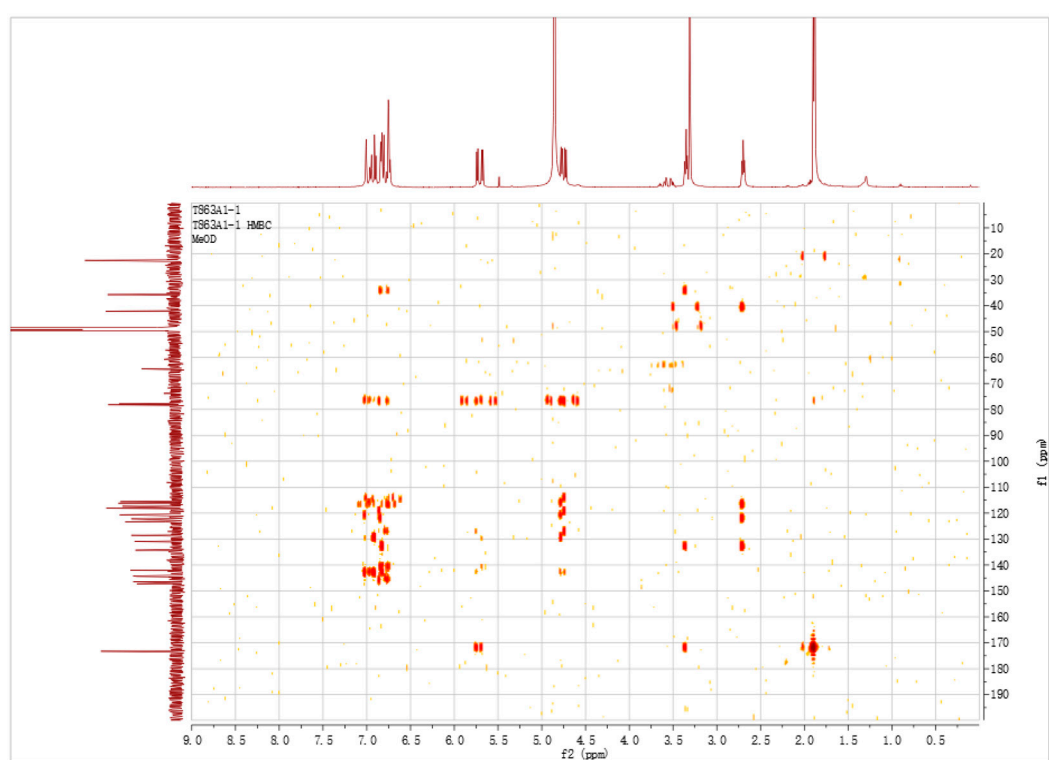

Figure S15. HMBC spectrum of 2 in methanol-*d*<sub>4</sub>.

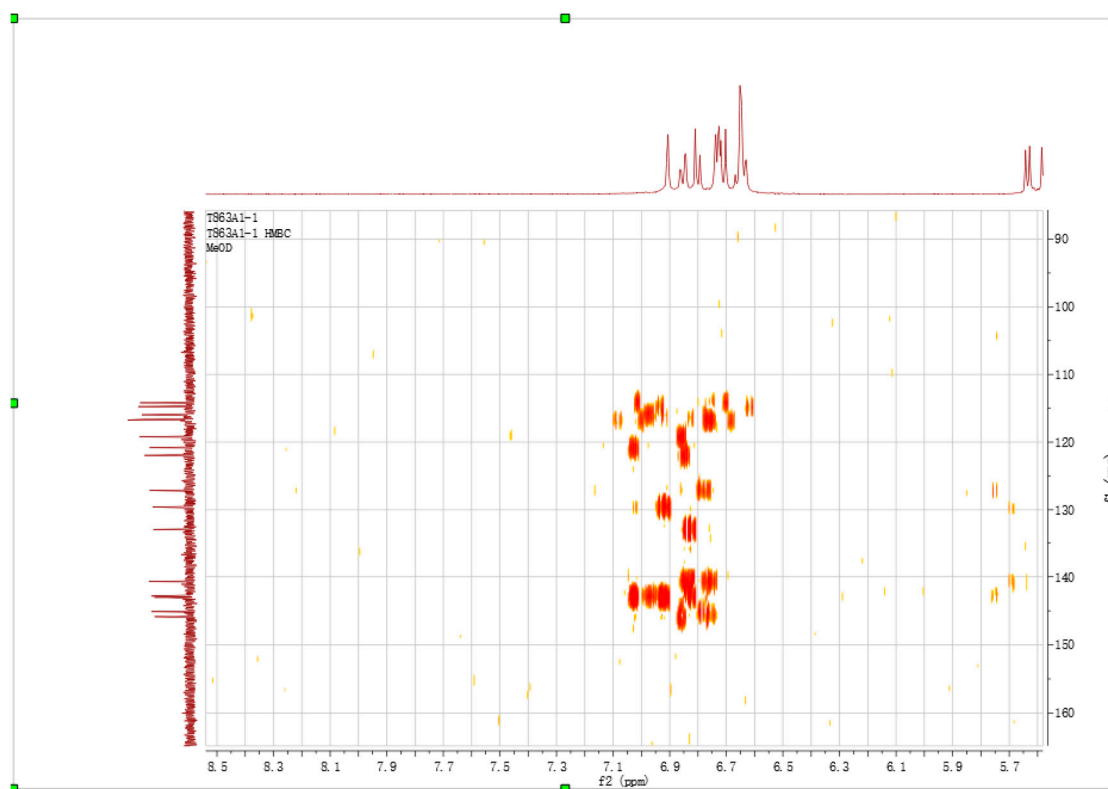

Figure S16. zoomed aromatic region of HMBC spectra of 2.

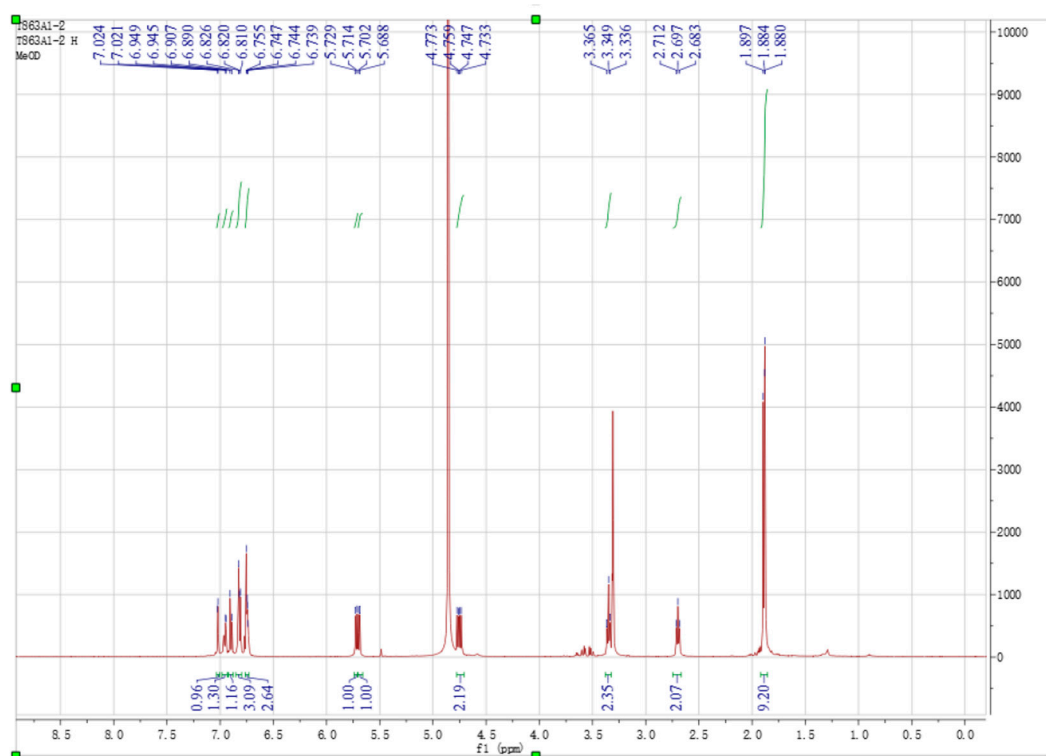Figure S17. <sup>1</sup>H-NMR spectrum of 3 in methanol-*d*<sub>4</sub>.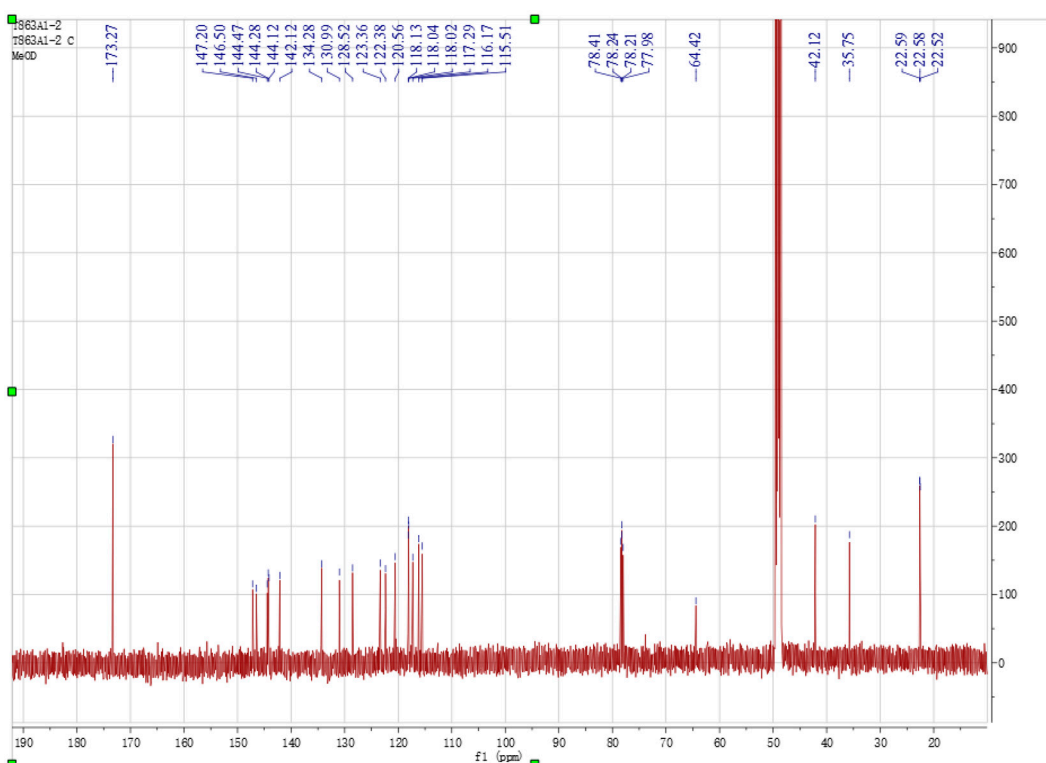Figure S18. <sup>13</sup>C-NMR spectrum of 3 in methanol-*d*<sub>4</sub>.

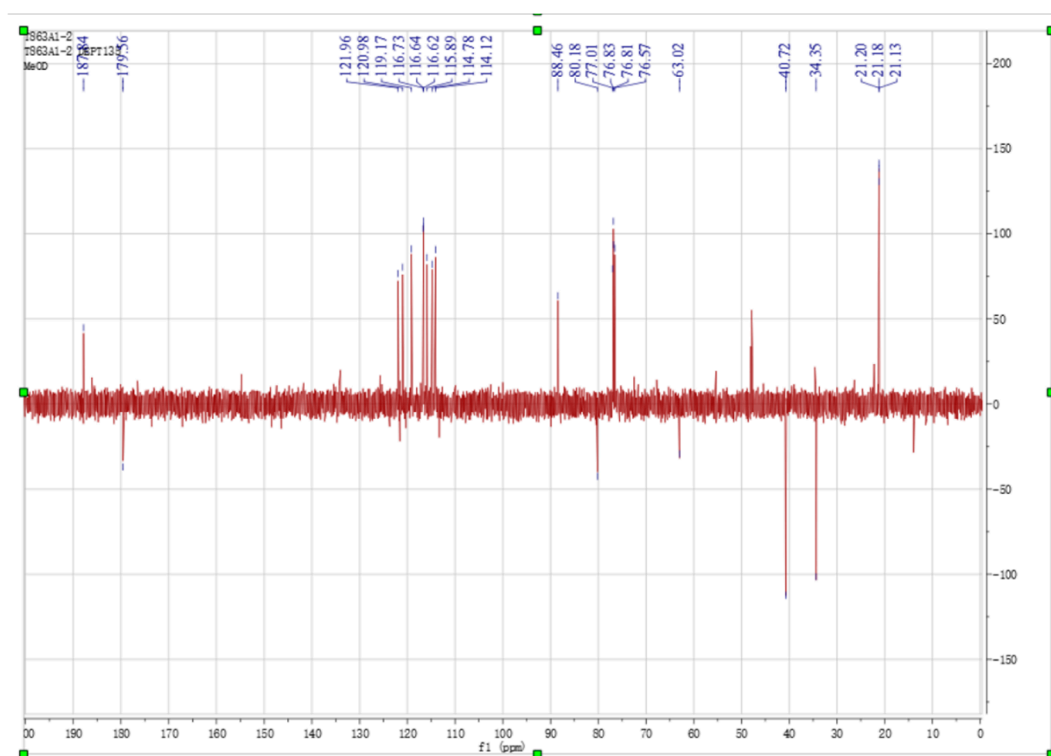

Figure S19. DEPT spectrum of 3 in methanol- $d_4$ .

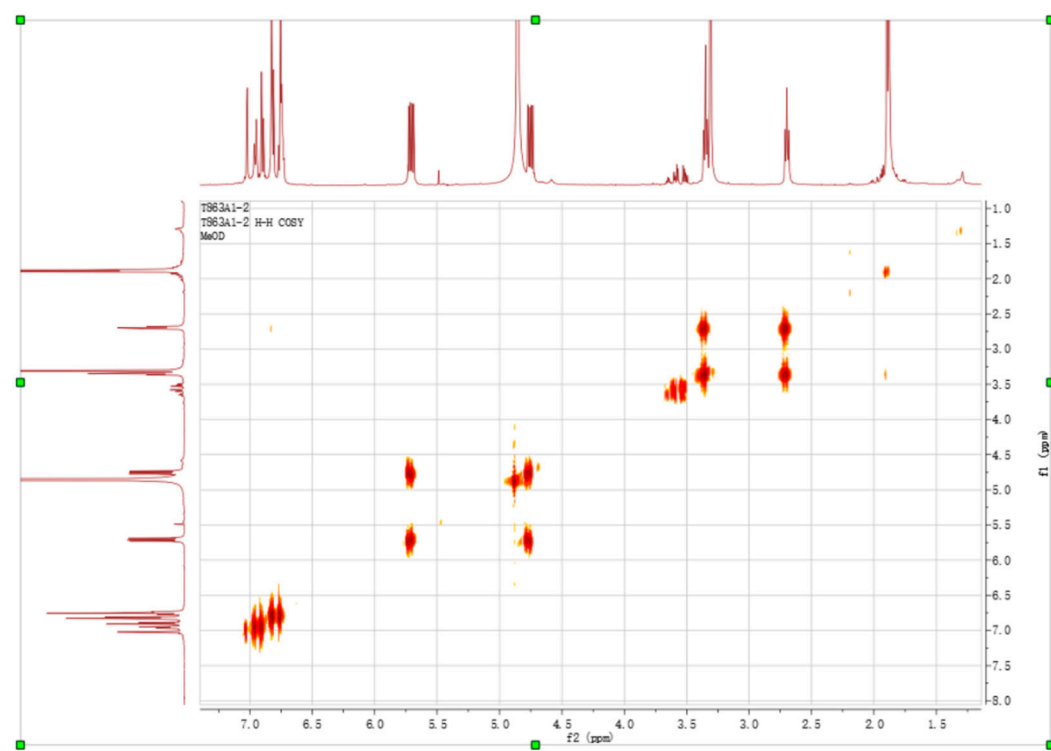

Figure S20.  $^1\text{H}$ - $^1\text{H}$  COSY spectrum of 3 in methanol- $d_4$ .

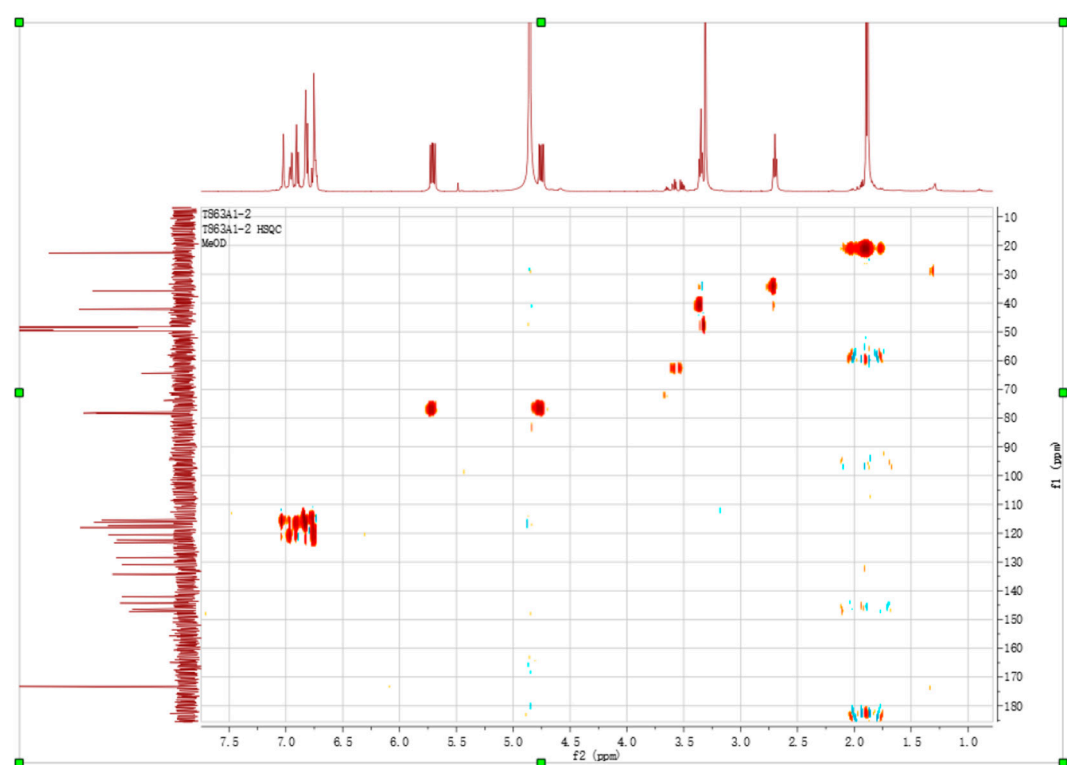

Figure S21. HSQC spectrum of 3 in methanol- $d_4$ .

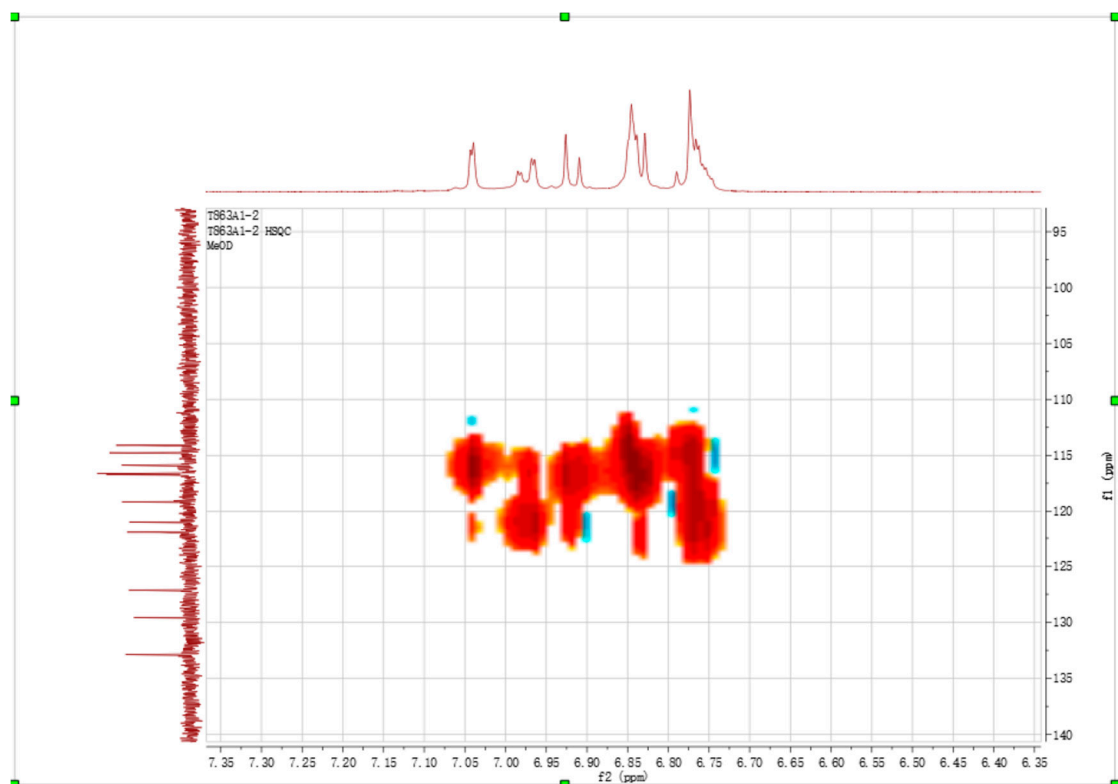

Figure S22. zoomed aromatic region of HSQC spectra of 3.

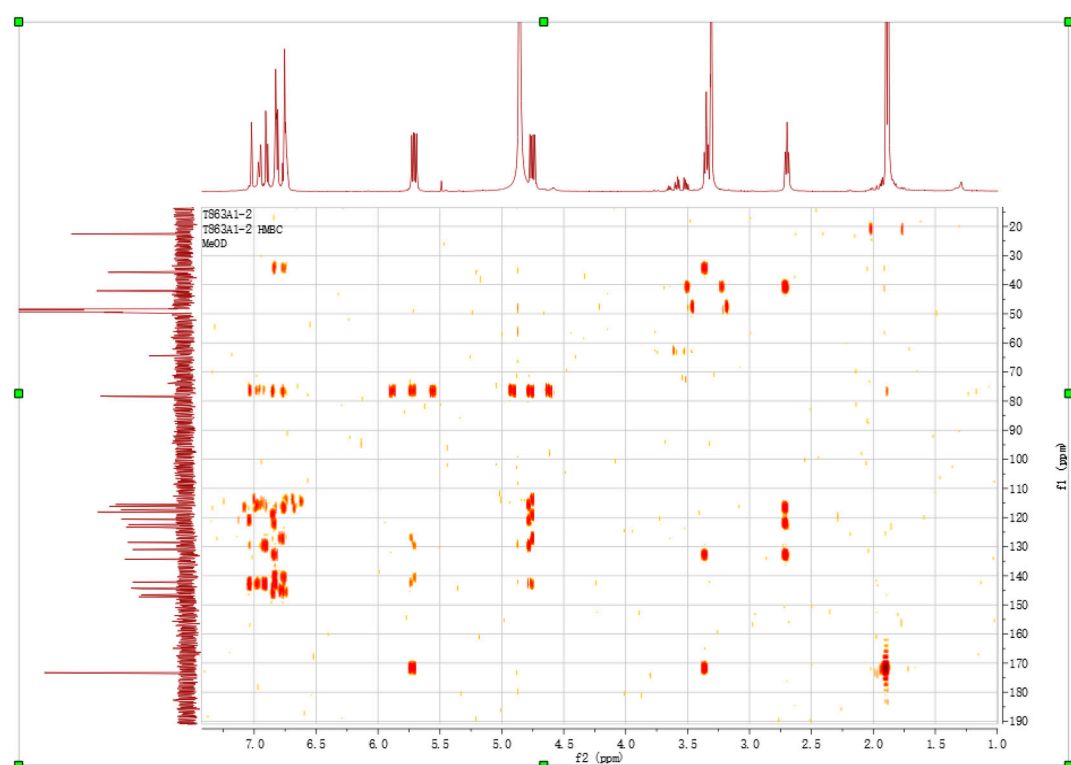

Figure S23. HMBC spectrum of 3 in methanol-*d*<sub>4</sub>.

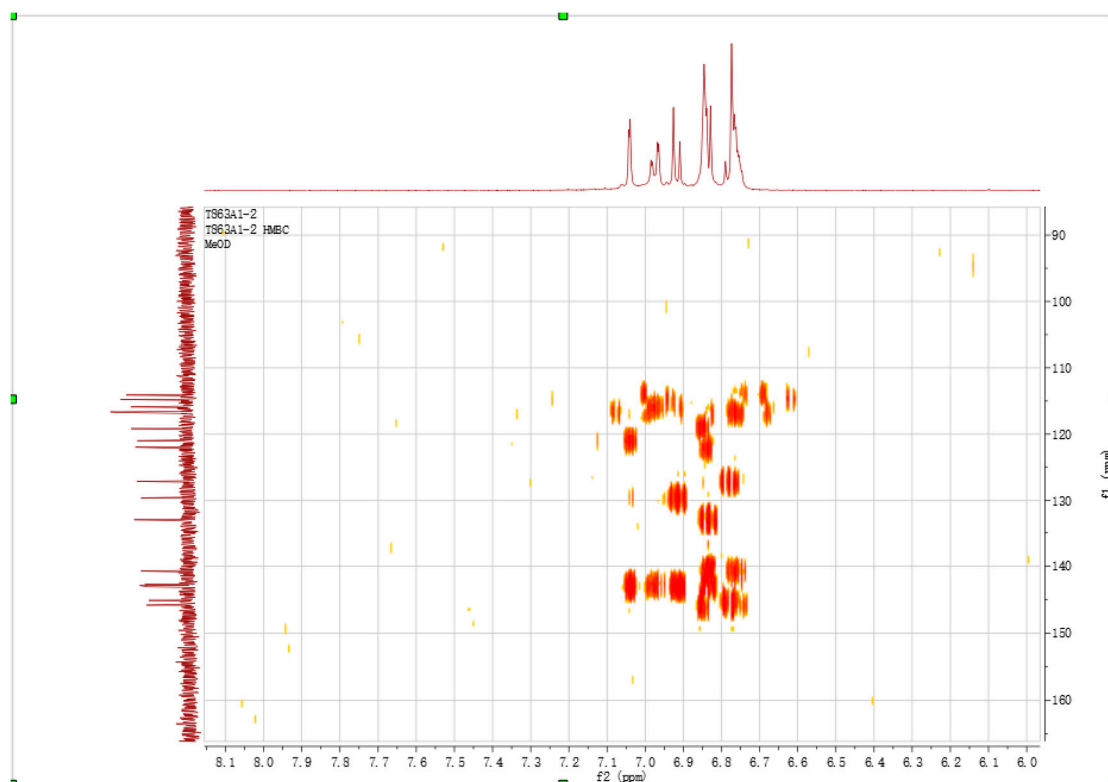

Figure S24. zoomed aromatic region of HMBC spectra of 3.

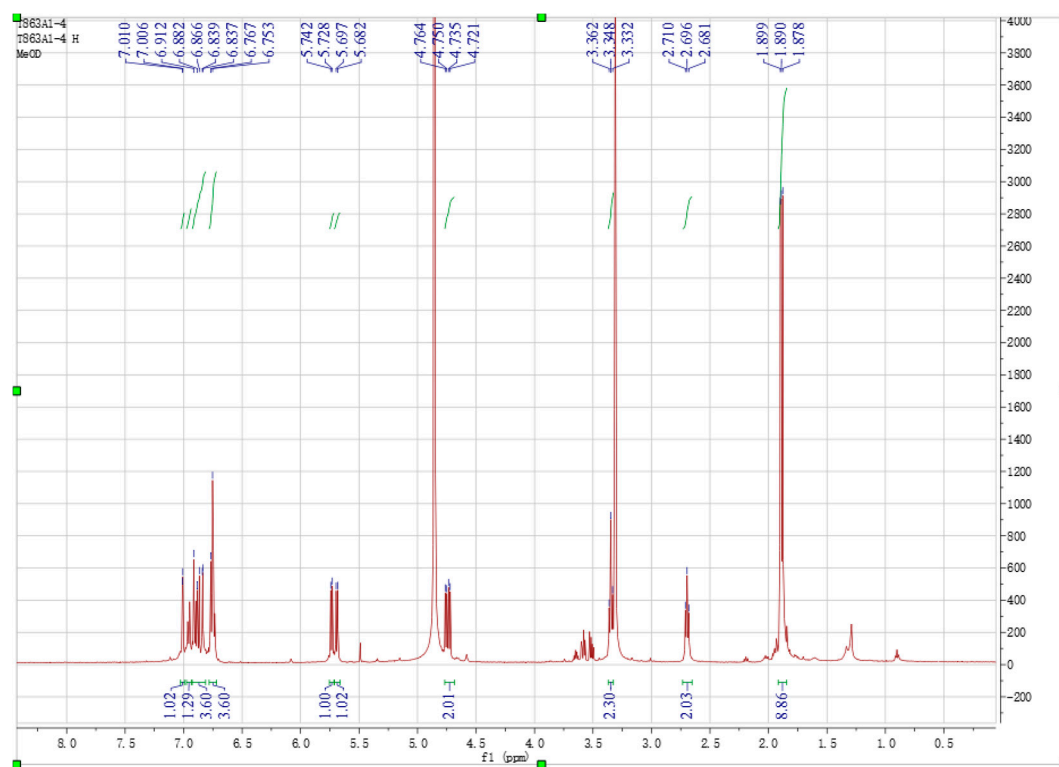Figure S25. <sup>1</sup>H-NMR spectrum of 4 in methanol-*d*<sub>4</sub>.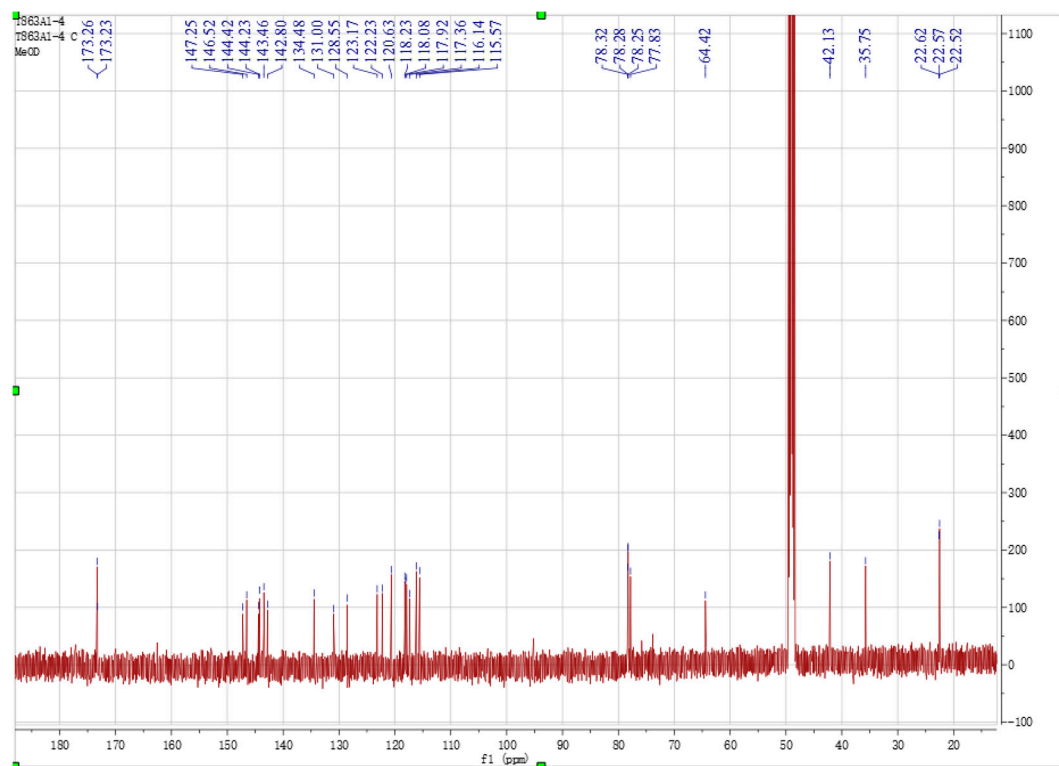Figure S26. <sup>13</sup>C-NMR spectrum of 4 in methanol-*d*<sub>4</sub>.

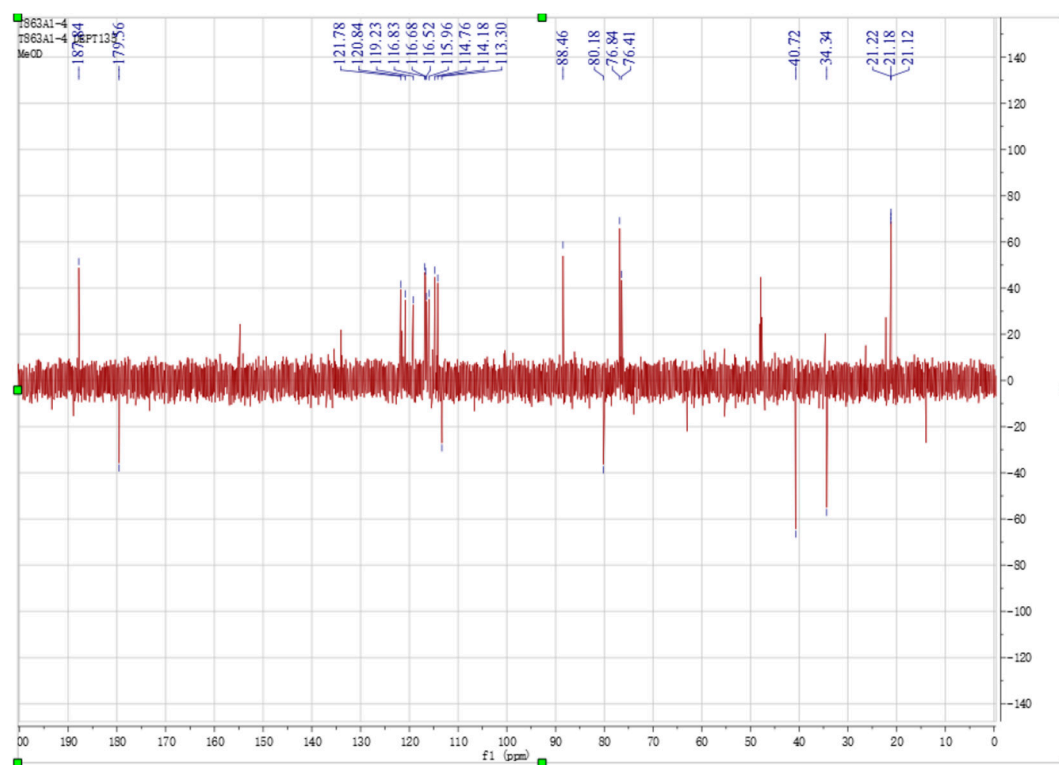Figure S27. DEPT spectrum of 4 in methanol- $d_4$ .Figure S28.  $^1\text{H}$ - $^1\text{H}$ -COSY spectrum of 4 in methanol- $d_4$ .

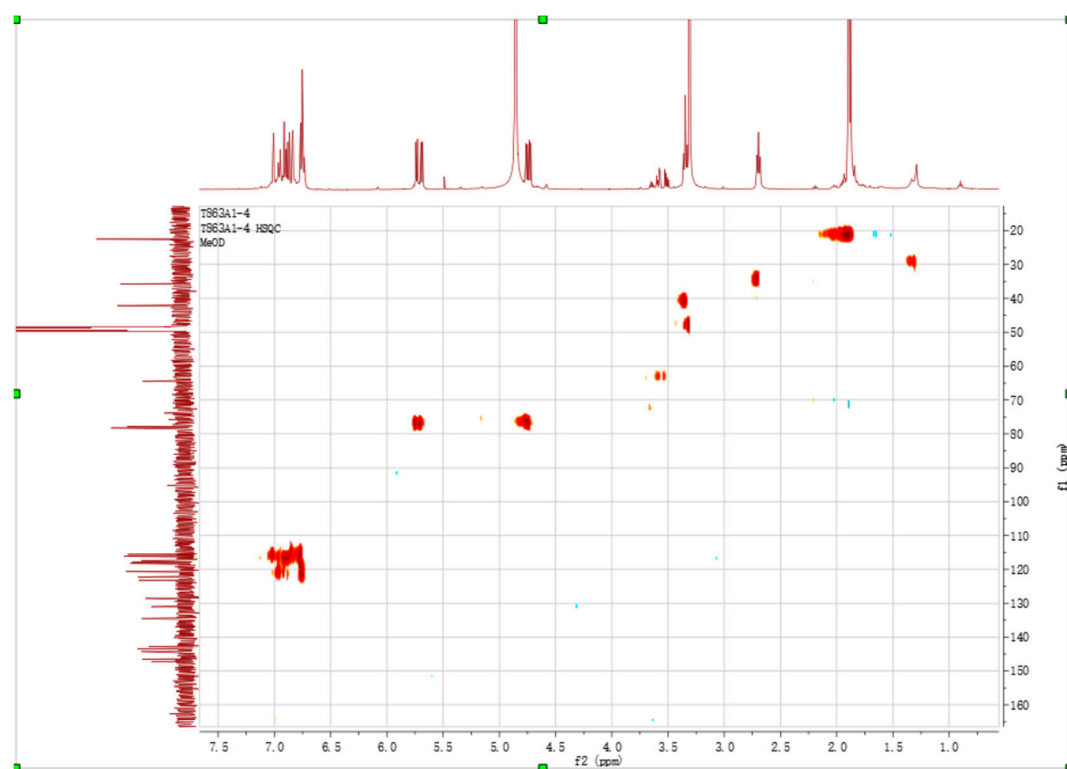Figure S29. HSQC spectrum of 4 in methanol- $d_4$ .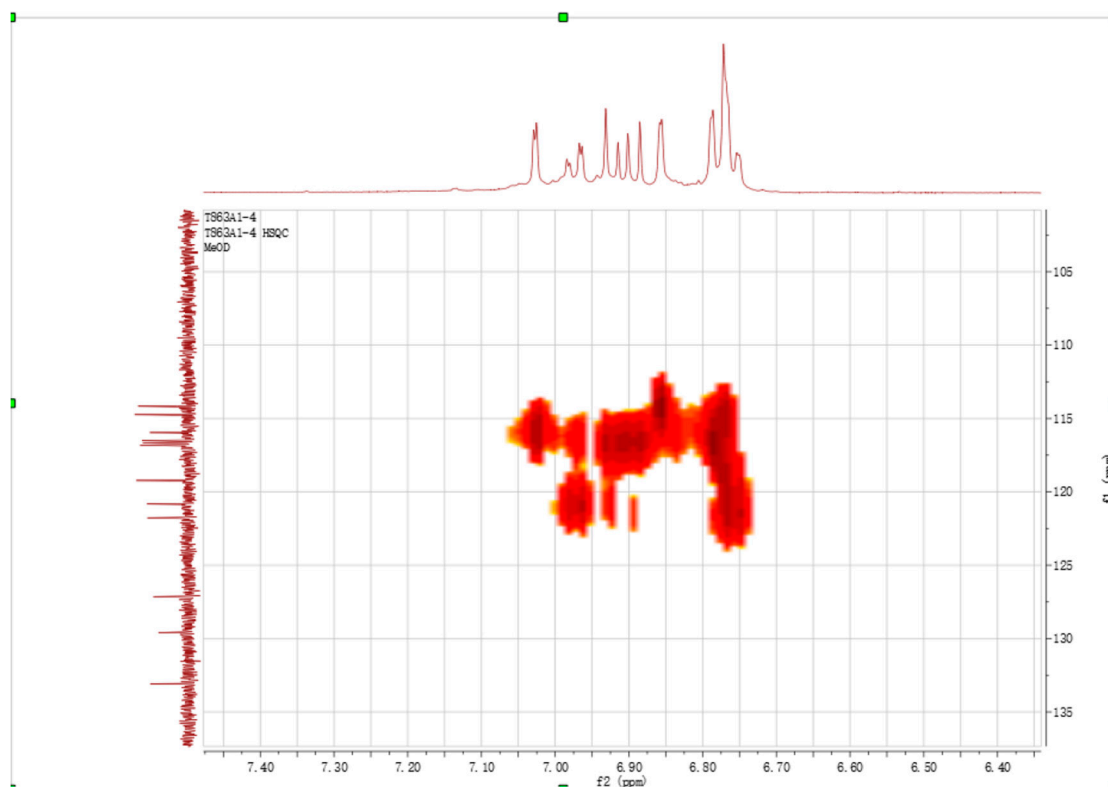

Figure S30. zoomed aromatic region of HSQC spectra of 4.



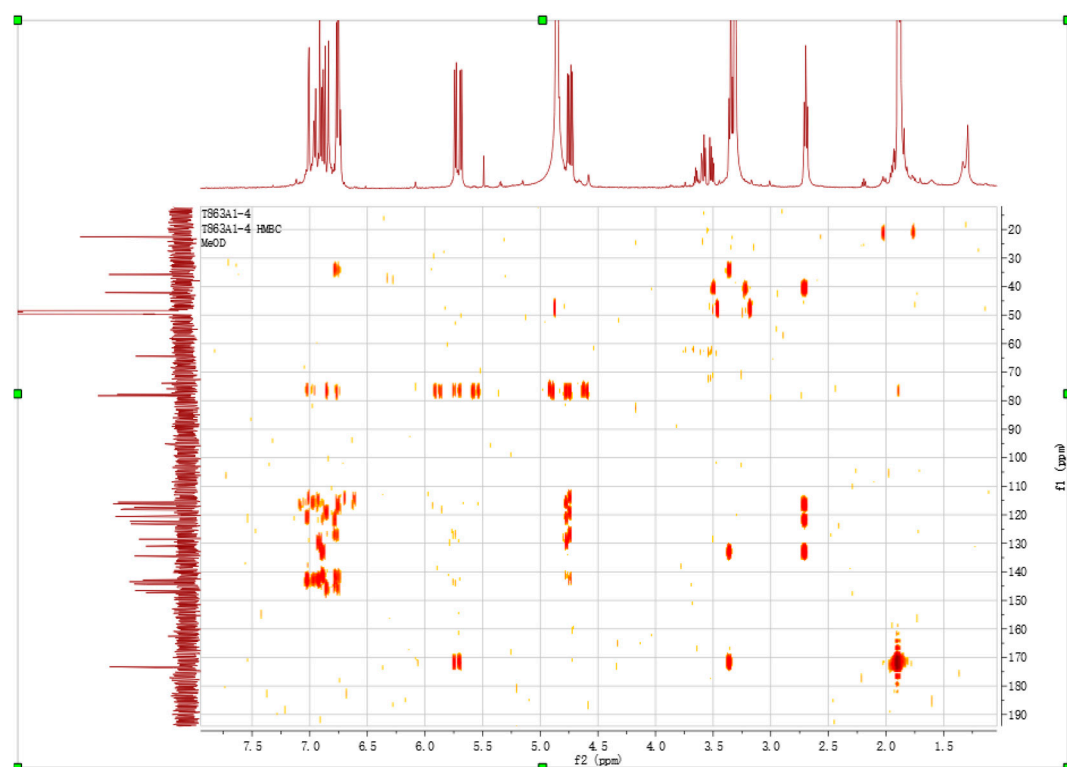

Figure S31. HMBC spectrum of 4 in methanol- $d_4$ .

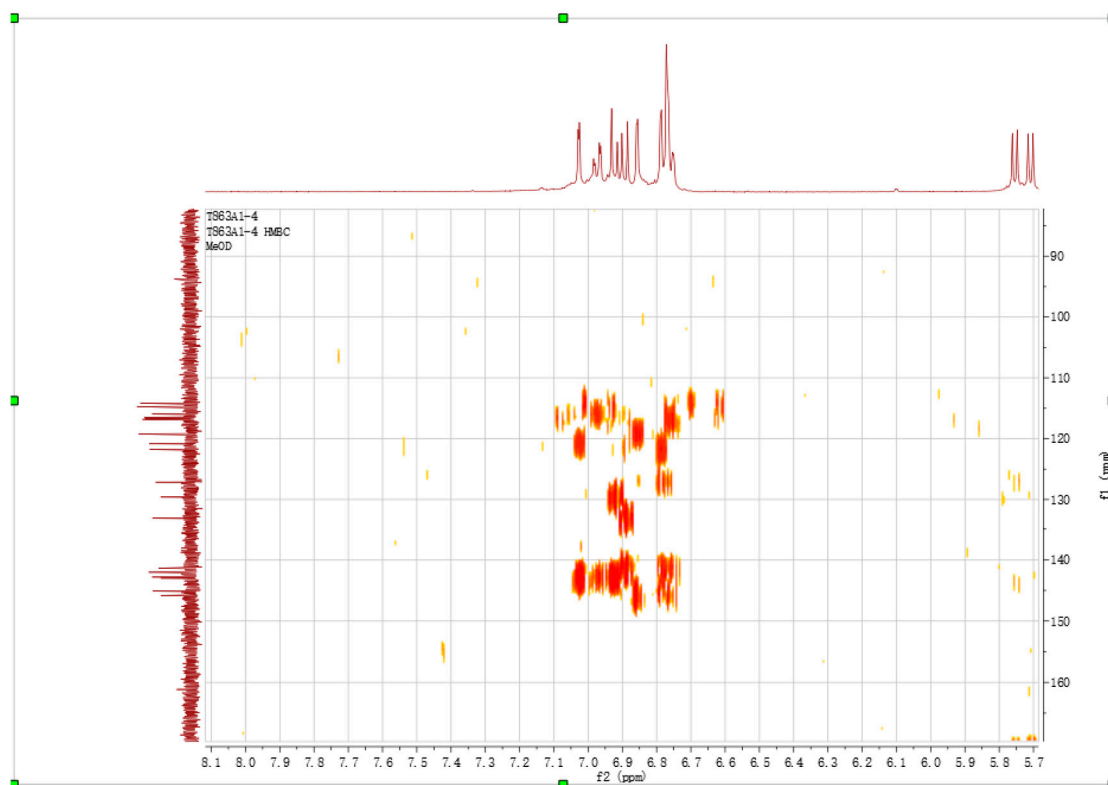

Figure S32. zoomed aromatic region of HMBC spectra of 4.

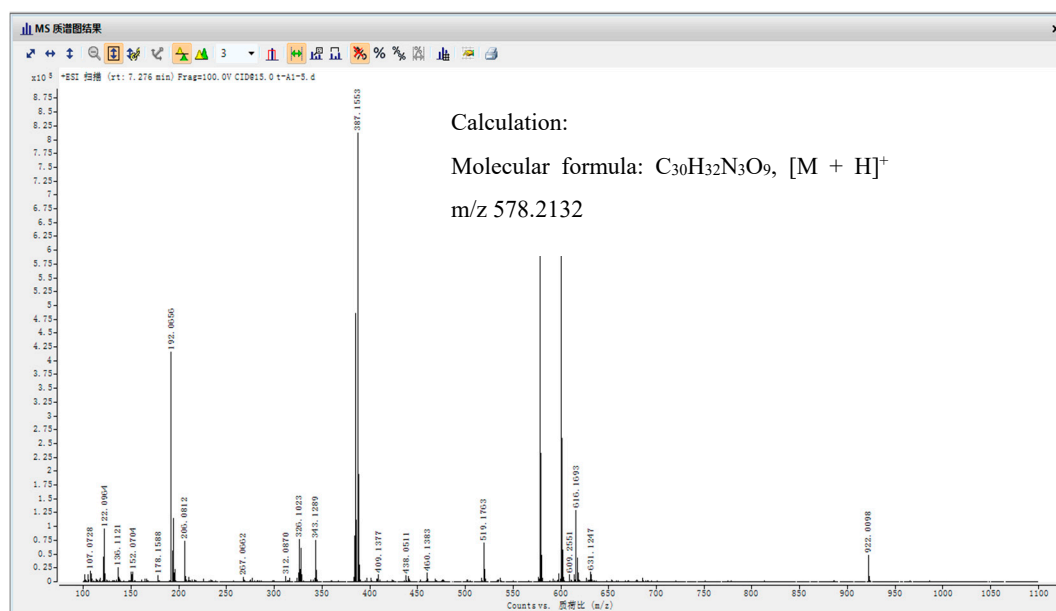

Figure S33. HR-ESI-MS of 1.

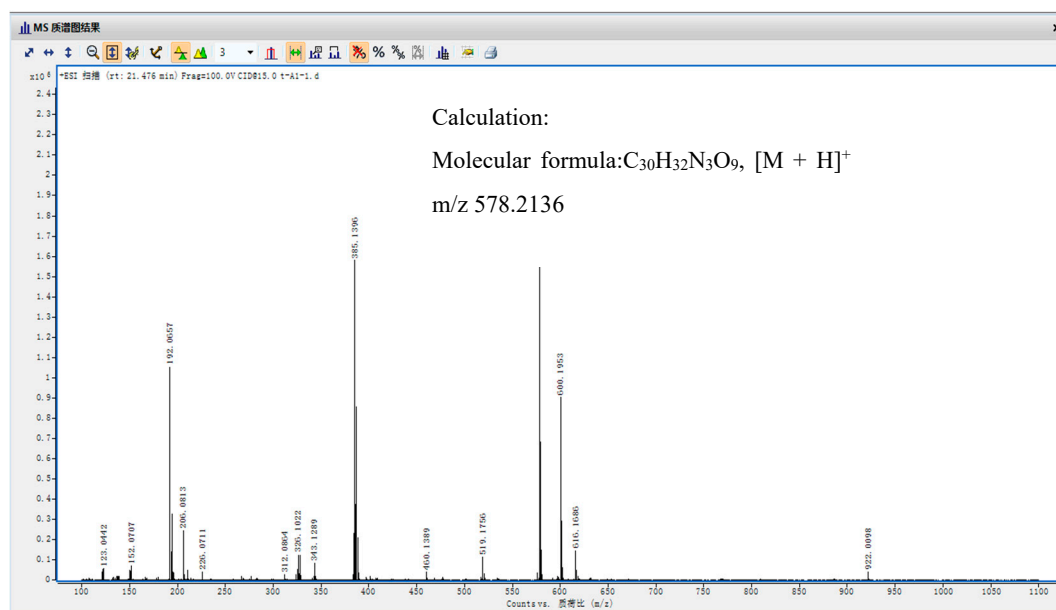

Figure S34. HR-ESI-MS of 2.

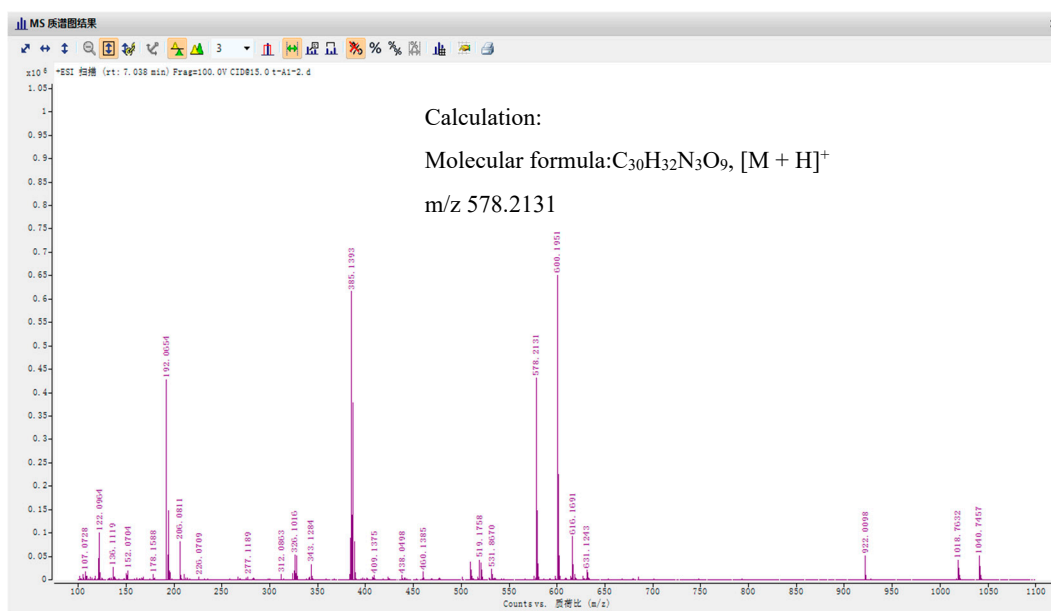

Figure S35. HR-ESI-MS of 3.

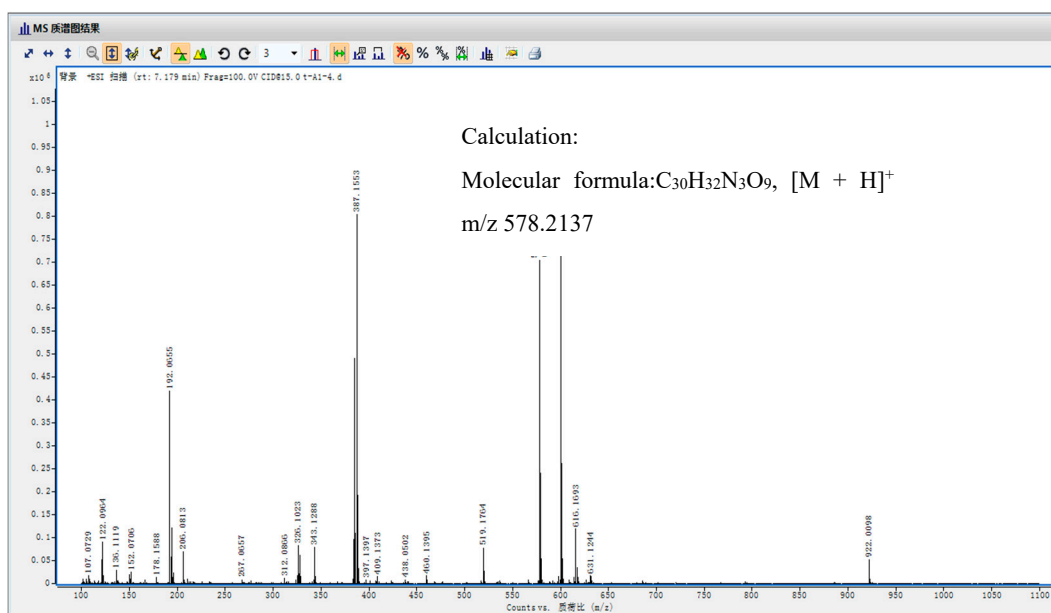

Figure S36. HR-ESI-MS of 4.
